# Supplementary material
Source: MDPI journal article supplement (https://www.mdpi.com/2227-7390/11/21/4488)
Supplement: s1 [file s1]

OD demand and distance matrices

This folder contains Mandl demand and distance matrices used in computations

onlyTransfer (see section 5.1.)

This folder contains computations of PTPM without considering waiting time of passengers. Only in-vehicle travel time and transfers of passengers are considered in PTPM model. Additionally, numeric details of the comparison of PTPM with the literature is given in the folder.

withWaitingTime (see section 5.2.)

This folder contains computations with considering waiting time of passengers as well as in-vehicle travel time and transfers of passengers.
