# Supplementary material
Source: MDPI journal article supplement (https://www.mdpi.com/2227-7390/11/21/4488)
Supplement: s1 [file s1]

Content of the folders:

MandlOriginalDemand.csv

The demand matrix of Mandl dataset (as in original form in the literature)

MandlTravelTimes.csv

The distance matrix of Mandl dataset
